# Supplementary material
Source: PubMed Central journal article supplement (PMC522053)

# Ce-LRP-1

extracellular space      membrane      cytoplasm

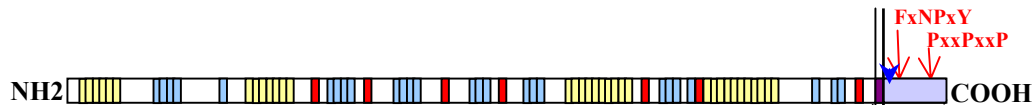

-  -LDLR, YWTD repeat
-  - LDLR, class A domain
-  - EGF-like domain
-  - transmembrane domain
-  - dileucine domain LL

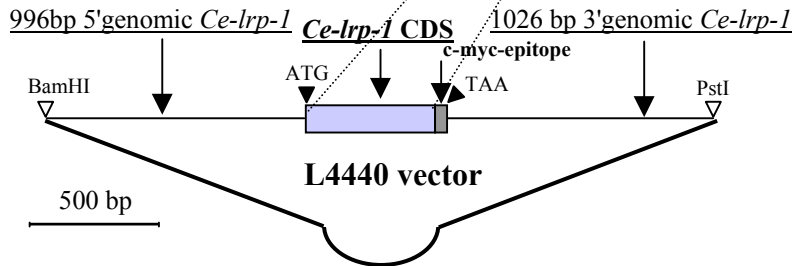

Supplement: pnas_101_41_14955__2.pdf [file pnas_101_41_14955__2.pdf]
