# Supplementary material
Source: PubMed Central journal article supplement (PMC522053)
Supplement: pnas_101_41_14955__3.pdf [file pnas_101_41_14955__3.pdf]

▼

PSEN1 : IMISALMALVFIKYLPEWTA-WLILAVISVYDLVAVLCPKGPLRMLVETAQ-----ERNET---IFPALIYSS-(77)-- : 367  
PSEN2 : IMISALMALVFIKYLPEWSA-WVILGATISVYDLVAVLCPKGPLRMLVETAQ-----ERNEP---IFPALIYSS-(52)-- : 348  
SEL-12 : ITMSALMALVFIKYLPEWTV-WFVLFVIVSWVDLVAVLTLPKGPLRMLVETAQ-----ERNEP---IFPALIYSS-(88)-- : 346

Ce-IMP-1 : INMALCMHVLKCLRPSLKWISITMLCMFVYDAFMVFGTPYMTTNGCSVML----EVATGLSCAAAGKNGKGYVPPPIEQESVPEKFPMLMQVAHFNPMEC : 498  
**Ce-IMP-2** : IGVSFSLGTERLHLASFKAGSLLLVGLFFYDIFWVFGTDVMTSVAKGIDA-----PILLQFQDIYRNGI---- : 340  
Ce-IMP-3 : IAFASIYVVCRIQAVSYQTALIFVIGMSLFDLFFLVVVDLLSTVVKENRS-----PLMILVERDTKGN----- : 422

**hIMP1** : FGLAFSLNGVELLHNNVSTGCTLLGGFLFYDVFVWVFGTNVMVTVAKSFEA-----PIKLVFPQDLLEKGL---- : 253  
hIMP2 : IAMGLCVAMIAFVRLPSLKVSCLLLSGLLIYDVFWVFFSAYIFNSNMVVKVATQPADNPLDVLRSRKLHLGPNVGRDVPRLSLPGKLVFES---STGS---- : 262  
hIMP3 : LGIAFCLNLIKTKLPNFKSCVILLGLLLIYDVFFVFIITPFIITKNGESIMV-----ELAAGPFGNNEKLPVVIRVPEKLIYFSVM---- : 398  
hIMP4 : LGIAFCLYMKTIRLPTFKACTLLLVFLFYDIFWVFIITPFLTCKSGSSIMV-----EVATGPSDSATREKLPMLKVER-LNSSPLA--- : 408  
hIMP5 : LGISYCLFVLRHRVRLPTLKNCSFLLALLAEDVFFVFIITPFFTKTGESIMA-----QVALGPAESSHERLPMVLKVER-LRVSALT--- : 435

Dr.-IMP1 : FGLAFAINGVEMLHNNVTVGVITLLSGLFFYDIFWVFGTNVMVTVAKSFEA-----PIKLVFPQDLIENGL---- : 262  
Dr.-IMP2 : MGMGLCVAFIAFVRLPSLKVSTLLLTGLLIYDVFWVFFLSSYIFSTNMVKV-ATRPADNPVGIVARKLHLGGIVRDPKLNLPKGLVFPES-LHNTGH---- : 257  
S.pomb-IMP : LAWALAANSISIMRIDSNTGALLLGLAFFYDIYFVFGTEVMVTVATGIDI-----PAKYVLEQFKNPT----- : 181  
Arab.-IMP : LGLSFCIQGHEMLSIGSEKTAGIILLGLFFYDIFWVFIITPVMVSVAKSFDA-----PIKLVFPQDGL---- : 229  
Arch.fulg : LMLAAGTATAFGISLEPLPV-IILLAVLAAYDAISVVRTRHMIKLAESVTA-----INAPMLFIIEKRDGN----- : 158

▼

PSEN1 : ILAGEDPEERGVKLGLGDFIFYSVLVGKASATAS-----GDWNTTIACFVAAILIGLCLTLLLLAIFKKALPALPISITFGLVF : 445 (467)  
PSEN2 : GEELEEEERGVKLGDFIFYSVLVGKAAATGS-----GDWNTTLACFVAAILIGLCLTLLLLAVFKKALPALPISITFGLVF : 426 (447)  
SEL-12 : NFHRHEEEERGVKLGDFIFYSVLVGKASSYFD-----WNTTIACYVAAILIGLCLTLLLLAVFKRALPALPISITFSGLVF : 422 (444)

Ce-IMP-1 : DLMEIELGFQFTIILGLGDIIVMPGYLVAHC--FTM-----NGFSERVRLIYGFISVYGYGILVITFLALALMKTAQPALIYLVPTLFP : 580 (652)  
**Ce-IMP-2** : -----MEASKHSMGLGDIIVPGIFIALLRFDY-----RVVQTTAESKAPQGSGLKGRYFVVTVAAYMAGLFIIMAVMHHFKAAQPALLYLVPCCLFV : 429 (468)  
Ce-IMP-3 : -----KQSLAAL-DIMVPGVFLNVVLKYSS-----MYDTNLFATFAAVFASLVFVSVFVSIWRSKTTTAMVLPAISAITF : 491 (509)

**hIMP1** : -----EANNFAMGLGDIIVPGIFIALLRFDI-----SLKKNTHTYFYTSFAAYIFGLGLTIFIMHIFKHAQPALLYLVPACTLGF : 329 (377)  
hIMP2 : -----HFSMLGIGDIIVMPGILLCFVLRDNYKKQASGDSCGAPGANISGRMQKVSFYHCTLIGYFVGLLTATVASRIHRAAQALLYLVPTLFP : 353 (384)  
hIMP3 : -----SVCLMPVSIILGFDIIVPGILLIAYCRRFDV-----QTGSSYIYVSSTVAYAI GMILTIVVVLVLMKKGQPALLYLVPCCLIT : 475 (520)  
hIMP4 : -----LCDRPFSLLGFDIIVPGILLIAYCHRFDI-----QVQSSRVYFVACTIAYGVGLLVTFVALALMQRGQPALLYLVPCCLVT : 484 (557)  
hIMP5 : -----LCSQFFSILGFDIIVMPGFLVAYCCRFDV-----QVCSRQIYFVACTIAYAVGLLVTFMAMVLMQMGQPALLYLVSSLT : 511 (684)

Dr.-IMP1 : -----NASNFAMGLGDIIVPGIFIALLRFDI-----SKKRKTRIFYSTLITAYFLGLLATIFVMHVFKHAQPALLYLVPACTLGF : 338 (389)  
Dr.-IMP2 : -----FMSMLGIGDIIVMPGILLCFVLRDNYKKQASGDSCGAPGANISGRMQKVSFYHCTLIGYFVGLLTATVASRIHRAAQALLYLVPTLFP : 345 (375)  
S.pomb-IMP : -----RLSMLGIGDIIVMPGILLIAYCRRFDI-----HYINSTSQPKKHSYFRNTFIAYGLGLGVNFALYFKAQPALLYLVSPACTLGF : 261 (295)  
Arab.-IMP : -----RPYSMLGIGDIIVPGIFIALLRFDI-----SRRRQPYFVACTIAYGVGLLVTFVALALMQRGQPALLYLVPCCLVT : 302 (344)  
Arch.fulg : -----AYMGVGDVMPNIIIVVSAQYFSN-----SPSVGFIKLPALFALIGGFAGLMILLYIVEKRGGAHFCIPFVNFAG : 230 (238)
