# Supplementary material
Source: PubMed Central journal article supplement (PMC522053)
Supplement: pnas_101_41_14955__7.pdf [file pnas_101_41_14955__7.pdf]

**Table 2. ISC phenotypes in N2 worms (P<sub>0</sub>) fed with dsRNA *Ce-imp-2* or dsRNA *Ce-lrp-1***

| <b>Strain</b> | <b>RNAi</b>     | <b>Total worms</b> | <b>ISC head</b> | <b>ICS tail</b> | <b>Body constrictions</b> |
|---------------|-----------------|--------------------|-----------------|-----------------|---------------------------|
| N2            | <i>Ce-imp-2</i> | 999 (100%)         | 240 (24%)       | 19 (1.9%)       | 4 (0.4%)                  |
| N2            | <i>Ce-lrp-1</i> | 326 (100%)         | 46 (14.1%)      | 12 (3.7%)       | 21 (6.4%)                 |
