# Supplementary material
Source: PubMed Central journal article supplement (PMC522053)

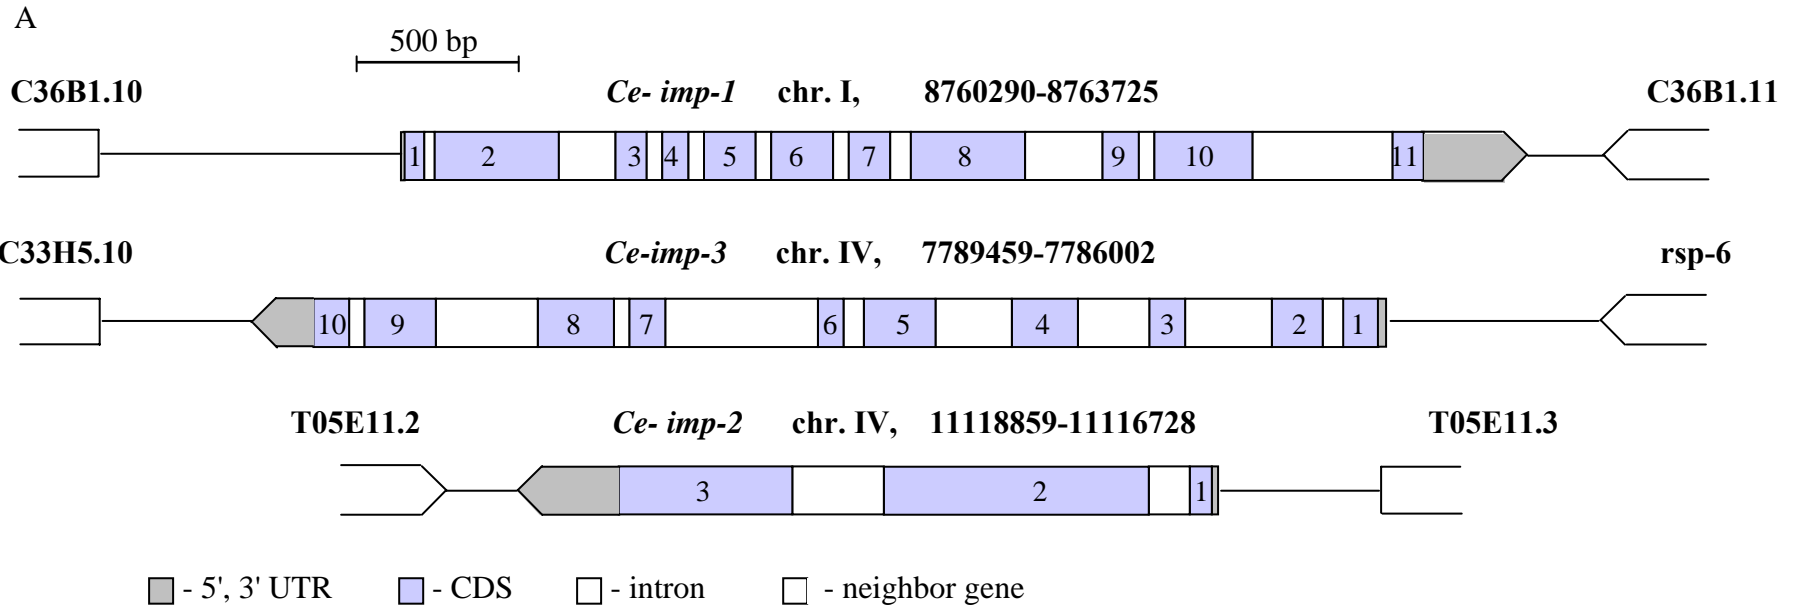

**B**

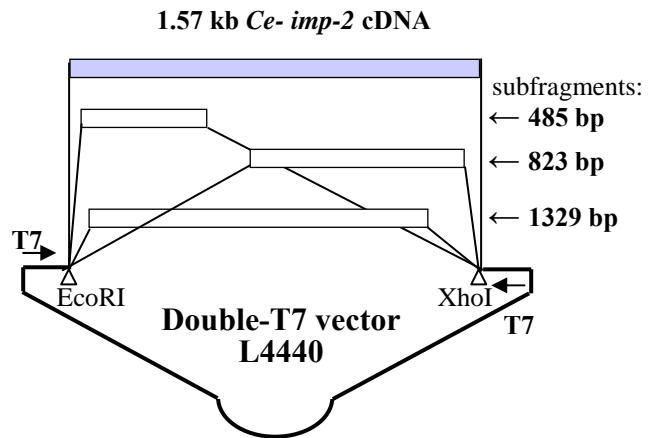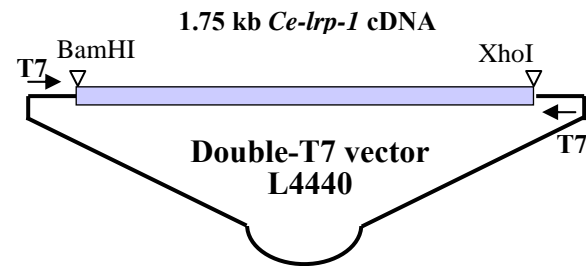

Supplement: pnas_101_41_14955__1.pdf [file pnas_101_41_14955__1.pdf]

A

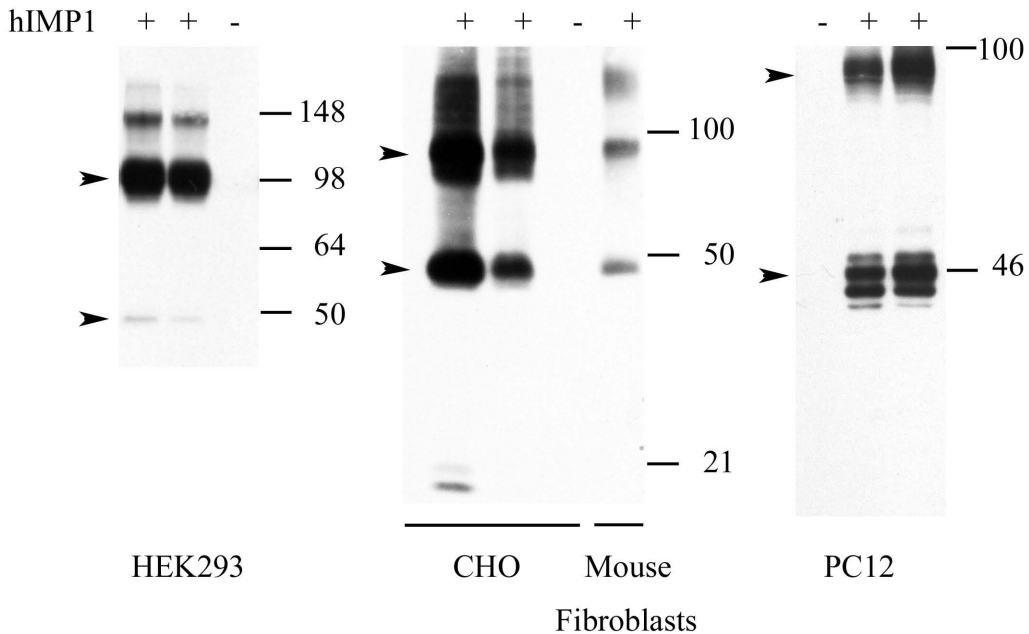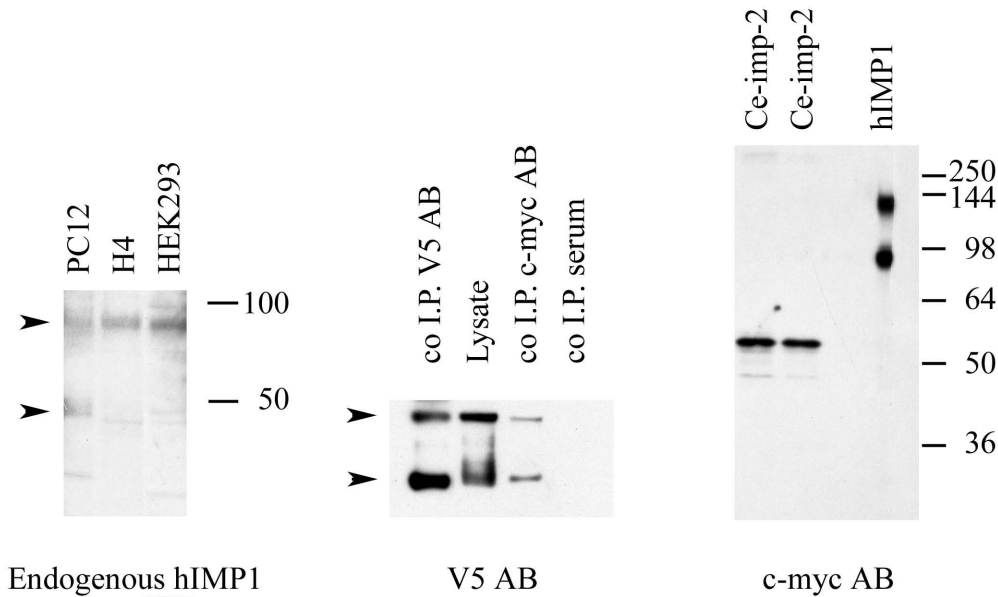

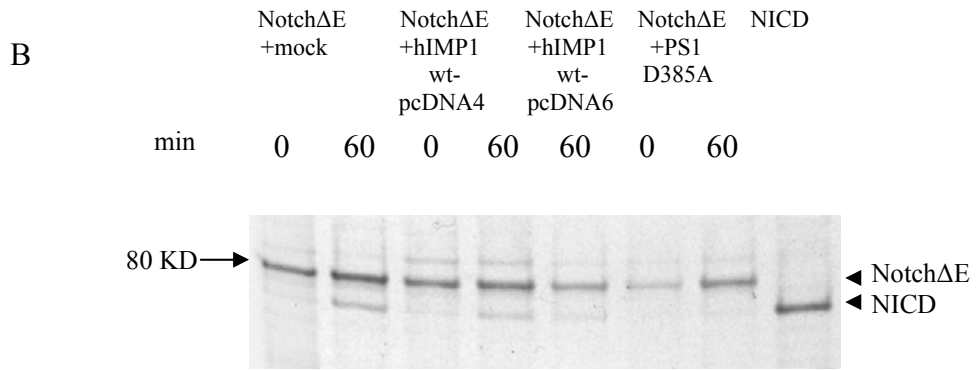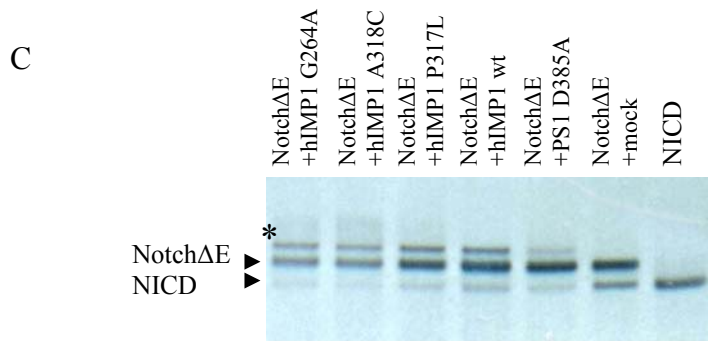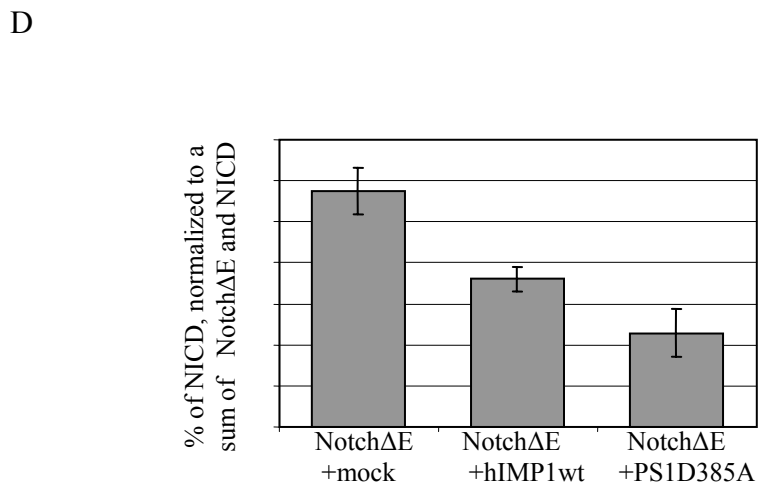

Supplement: pnas_101_41_14955__4.pdf [file pnas_101_41_14955__4.pdf]

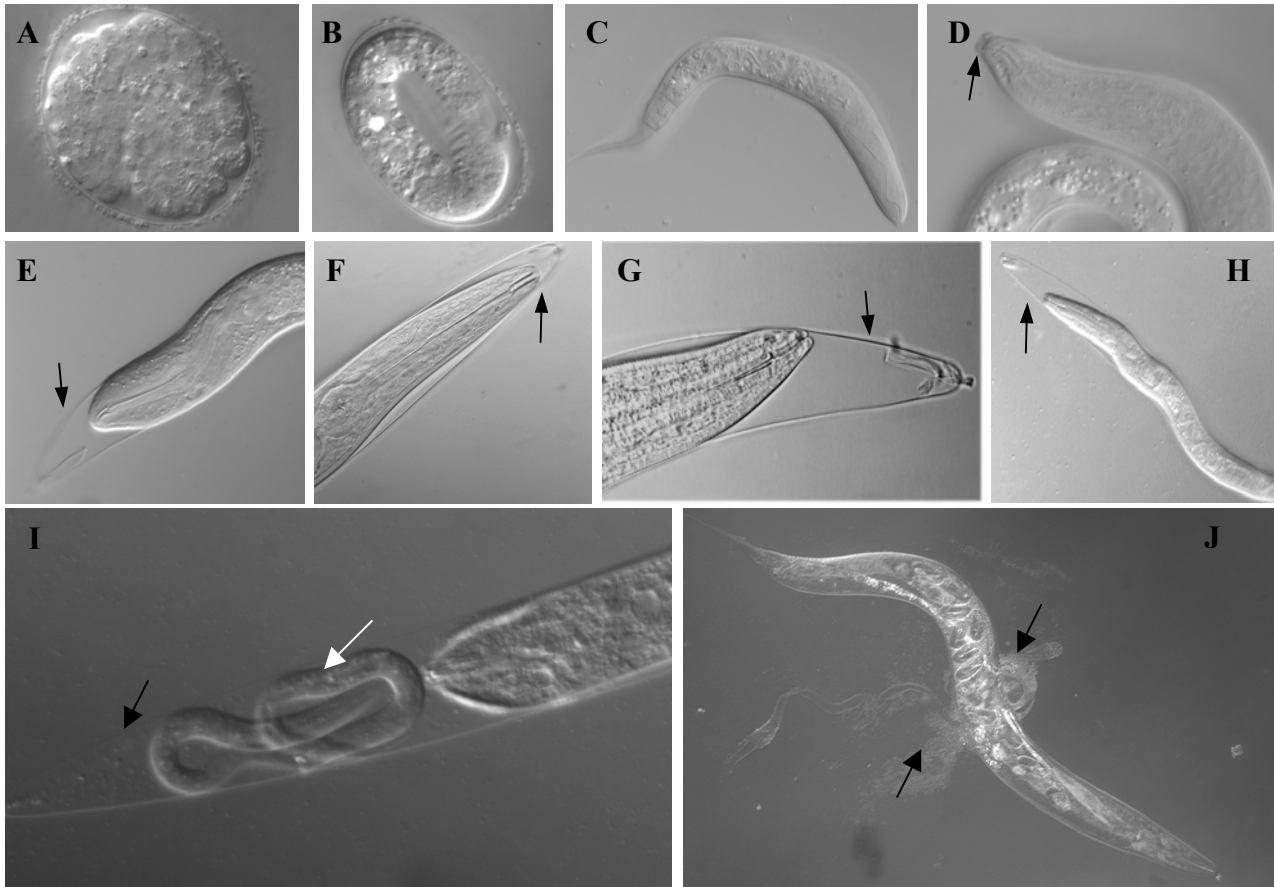

Supplement: pnas_101_41_14955__5.pdf [file pnas_101_41_14955__5.pdf]

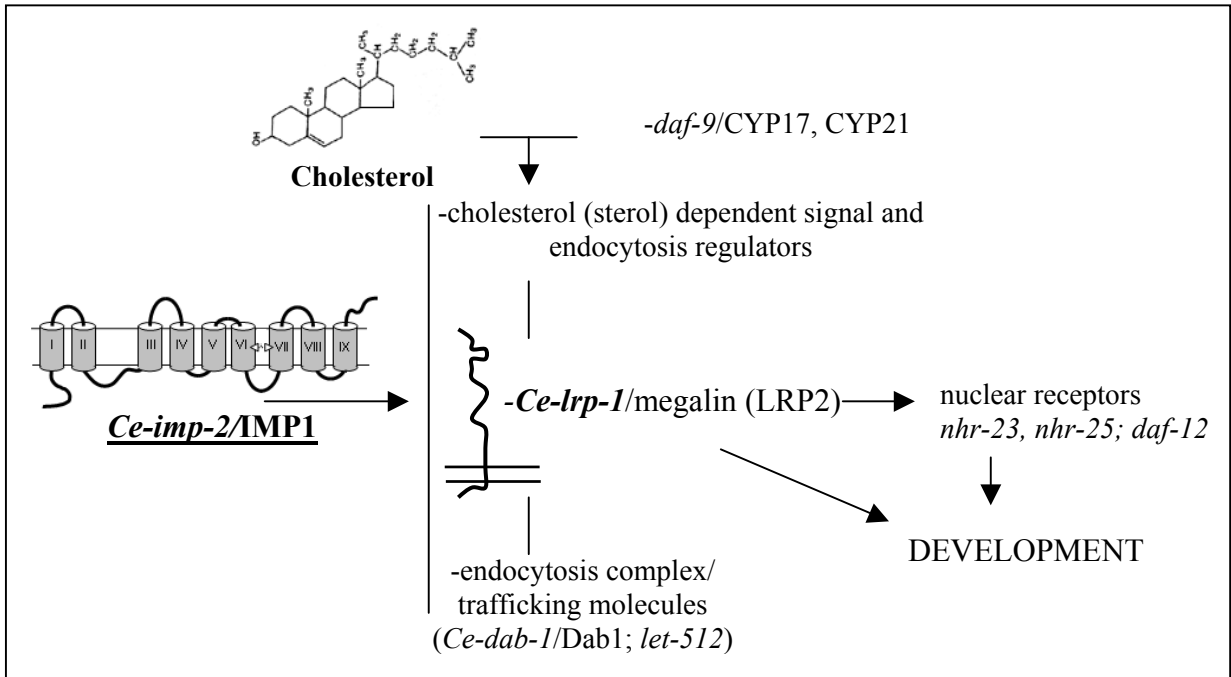

Supplement: pnas_101_41_14955__9.pdf [file pnas_101_41_14955__9.pdf]
